# Supplementary material for: Development of a High-Throughput Analytical Method for Antimicrobials in Wastewater Using an Automated Pipetting and Solid-Phase Extraction System
Source: MDPI journal article supplement (doi:10.3390/antibiotics13040335), 2024-04-05
Supplement: s1 [file s1]

## **Development of a High-throughput Analytical Method for Antimicrobials in Wastewater using an Automated Pipetting and Solid-Phase Extraction System**

Author names: Takashi Azuma <sup>1,\*</sup>, Nobuaki Matsunaga <sup>2</sup>, Norio Ohmagari <sup>2,3</sup>, Makoto Kuroda <sup>4,\*</sup>

Affiliation:

<sup>1</sup> Department of Pharmacy, Osaka Medical and Pharmaceutical University, Takatsuki 569-1094, Japan

<sup>2</sup> AMR Clinical Reference Center, National Center for Global Health and Medicine, Tokyo 162-8655, Japan

<sup>3</sup> Disease Control and Prevention Center, National Center for Global Health and Medicine, Tokyo 162-8655, Japan

<sup>4</sup> Pathogen Genomics Center, National Institute of Infectious Diseases, Tokyo 162-8640, Japan

\*Corresponding author: Takashi Azuma

Affiliation: Department of Pharmacy, Osaka Medical and Pharmaceutical University, 4-20-1 Nasahara, Takatsuki, Osaka 569-1094, Japan

Tel: +81-72-690-1055, Fax: +81-72-690-1055

e-mail address: takashi.azuma@ompu.ac.jp, t.azuma.mail@gmail.com

\*Corresponding author: Makoto Kuroda

Affiliation: Pathogen Genomics Center, National Institute of Infectious Diseases, Toyama 1-23-1, Shinjuku-ku, Tokyo 162-8640, Japan

Tell: +81-3-5285-1111, Fax: +81-3-5285-1150

e-mail address: makokuro@niid.go.jp

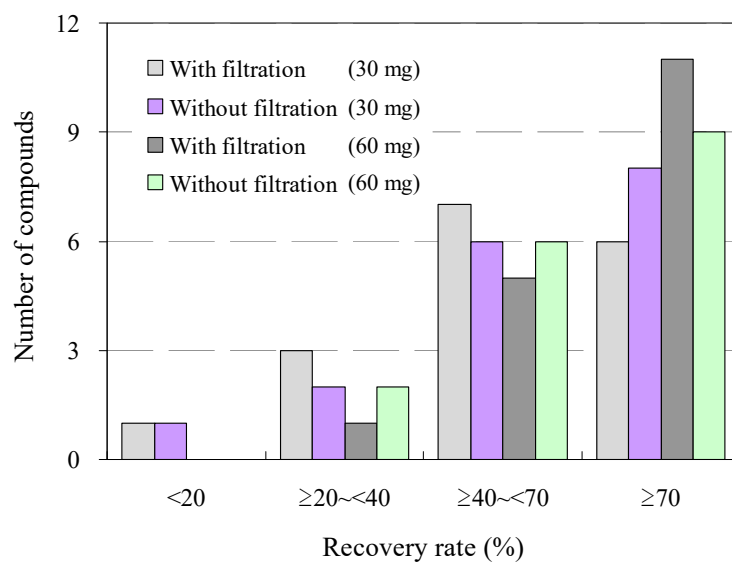

Figure S1. Effect of filtration manipulation and recovery under conditions of antimicrobial determination in wastewater using 96-well SPE plates.

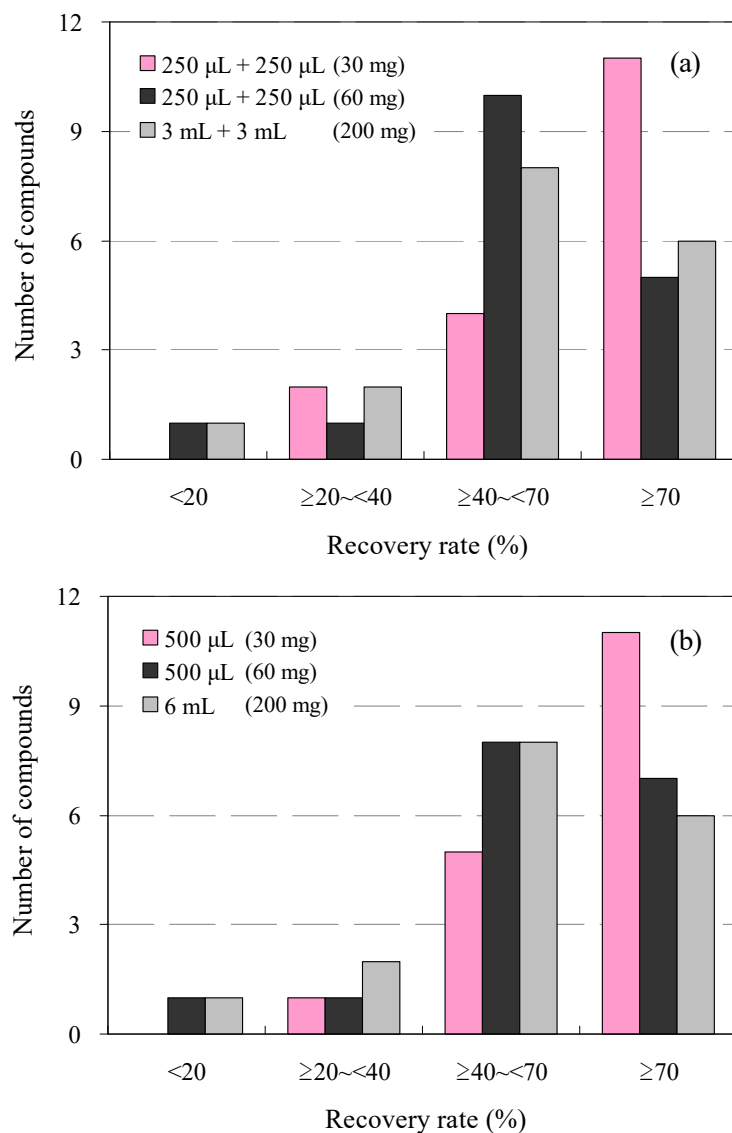

Figure S2. Influence of elution frequency and recovery studies under wastewater antimicrobial determination conditions using 96-well SPE plates and comparison with syringe barrel SPE using conventional methods: (a) one-time extraction and (b) twice extraction.

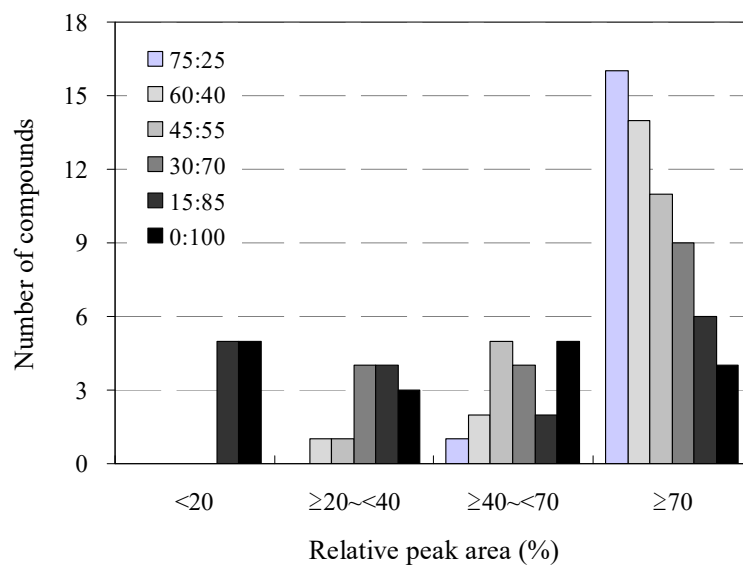

Figure S3. Effect of final solvent composition on the peak area of each antimicrobial in the LC-MS/MS measurements.

Table S1. The presence of antimicrobials in the hospital wastewater was based on the manual analysis by manual analysis using a syringe-barrel SPE cartridge.

| Antimicrobials       | 2021  |        |        |       |       |       |        |       |       |        | 2022   |       |        |       |        |        |        |         |        |        | 2023   |         |       |        |        | Mean (SD) | Max             | Min     | Frequency (%) |      |
|----------------------|-------|--------|--------|-------|-------|-------|--------|-------|-------|--------|--------|-------|--------|-------|--------|--------|--------|---------|--------|--------|--------|---------|-------|--------|--------|-----------|-----------------|---------|---------------|------|
|                      | 0126  | 0426   | 0531   | 0629  | 0727  | 0830  | 0921   | 1026  | 1129  | 1221   | 0228   | 0328  | 0425   | 0525  | 0627   | 0725   | 0829   | 0928    | 1031   | 1129   | 1226   | 0130    | 0228  | 0327   | 0424   |           |                 |         |               | 0529 |
| Ampicillin           | N.D.  | N.D.   | N.D.   | N.D.  | N.D.  | 1,570 | 213    | N.D.  | N.D.  | N.D.   | 48,694 | 3,069 | 1,191  | 1,836 | 10,063 | N.D.   | 82,844 | 164,030 | 1,204  | 2,508  | 16,594 | 266,914 | 498   | N.D.   | 1,008  | 263       | 37,656 (75,321) | 266,914 | 213           | 100  |
| Benzylpenicillin     | N.D.  | N.D.   | N.D.   | N.D.  | N.D.  | N.D.  | N.D.   | N.D.  | N.D.  | N.D.   | N.D.   | N.D.  | N.D.   | N.D.  | N.D.   | N.D.   | N.D.   | N.D.    | N.D.   | N.D.   | N.D.   | N.D.    | N.D.  | N.D.   | N.D.   | N.D.      | N.A.            | N.A.    | N.A.          | N.A. |
| Cefdinir             | N.D.  | N.D.   | N.D.   | N.D.  | N.D.  | N.D.  | N.D.   | N.D.  | N.D.  | N.D.   | N.D.   | N.D.  | N.D.   | N.D.  | N.D.   | N.D.   | N.D.   | N.D.    | N.D.   | N.D.   | N.D.   | N.D.    | N.D.  | N.D.   | N.D.   | N.D.      | N.A.            | N.A.    | N.A.          | N.A. |
| Cefpodoxime          | 161   | N.D.   | N.D.   | 890   | N.D.  | 430   | N.D.   | N.D.  | 2,455 | 281    | 6,165  | 581   | 4,334  | 3,968 | N.D.   | 553    | 2,883  | 427     | 140    | 3,662  | 1,018  | 426     | 108   | 415    | 5,458  | N.D.      | 1,808 (1,990)   | 6,165   | 108           | 100  |
| Cefpodoxime Proxetil | N.D.  | N.D.   | N.D.   | N.D.  | N.D.  | N.D.  | N.D.   | N.D.  | N.D.  | N.D.   | N.D.   | N.D.  | N.D.   | N.D.  | N.D.   | N.D.   | N.D.   | N.D.    | N.D.   | N.D.   | N.D.   | N.D.    | N.D.  | N.D.   | N.D.   | N.D.      | N.A.            | N.A.    | N.A.          | N.A. |
| Cefiofur             | N.D.  | N.D.   | N.D.   | N.D.  | N.D.  | N.D.  | N.D.   | N.D.  | N.D.  | N.D.   | N.D.   | N.D.  | N.D.   | N.D.  | N.D.   | N.D.   | N.D.   | N.D.    | N.D.   | N.D.   | N.D.   | N.D.    | N.D.  | N.D.   | N.D.   | N.D.      | N.A.            | N.A.    | N.A.          | N.A. |
| Ciprofloxacin        | N.D.  | N.D.   | N.D.   | N.D.  | 481   | N.D.  | 154    | 88    | N.D.  | 1,872  | N.D.   | N.D.  | N.D.   | N.D.  | N.D.   | N.D.   | N.D.   | N.D.    | 95     | 151    | N.D.   | N.D.    | 124   | N.D.   | N.D.   | N.D.      | 423 (653)       | 1,872   | 88            | 100  |
| Enrofloxacin         | N.D.  | N.D.   | N.D.   | N.D.  | N.D.  | N.D.  | N.D.   | N.D.  | N.D.  | N.D.   | N.D.   | N.D.  | N.D.   | N.D.  | N.D.   | N.D.   | N.D.   | N.D.    | N.D.   | N.D.   | N.D.   | N.D.    | N.D.  | N.D.   | N.D.   | N.D.      | N.A.            | N.A.    | N.A.          | N.A. |
| Levofloxacin         | 9,337 | 7,441  | 15,308 | 3,209 | 2,926 | 1,080 | 3,525  | 1,137 | 1,045 | 36,448 | 20,354 | 4,162 | 13,504 | 1,346 | 24,524 | 2,749  | 13,054 | 6,696   | 46,320 | 58,247 | 1,408  | 1,503   | 5,350 | 4,058  | 36,380 | 19,739    | 13,110 (15,508) | 58,247  | 1,045         | 100  |
| Azithromycin         | N.D.  | N.D.   | 1,774  | 420   | N.D.  | N.D.  | N.D.   | N.D.  | N.D.  | 891    | 329    | N.D.  | 2,037  | N.D.  | N.D.   | N.D.   | N.D.   | N.D.    | N.D.   | N.D.   | N.D.   | N.D.    | N.D.  | N.D.   | 6,948  | N.D.      | 2,066 (2,491)   | 6,948   | 329           | 100  |
| Clarithromycin       | 1,590 | 116    | 205    | 476   | 1,803 | N.D.  | 305    | N.D.  | 475   | 15,310 | 307    | 6,003 | N.D.   | N.D.  | 2,215  | 195    | 202    | 216     | 990    | 2,768  | 595    | 564     | N.D.  | 349    | 209    | 1,930     | 1,754 (3,395)   | 15,310  | 116           | 100  |
| Chlortetracycline    | N.D.  | N.D.   | N.D.   | N.D.  | N.D.  | N.D.  | N.D.   | N.D.  | N.D.  | N.D.   | N.D.   | N.D.  | N.D.   | N.D.  | N.D.   | N.D.   | N.D.   | N.D.    | N.D.   | N.D.   | N.D.   | N.D.    | N.D.  | N.D.   | N.D.   | N.D.      | N.A.            | N.A.    | N.A.          | N.A. |
| Doxycycline          | N.D.  | 8,672  | 703    | 82    | 132   | N.D.  | 16,519 | N.D.  | 307   | 207    | 964    | 1,136 | 566    | 299   | 191    | N.D.   | N.D.   | N.D.    | 1,676  | 258    | N.D.   | N.D.    | 389   | 139    | 1,516  | 58        | 1,878 (4,153)   | 16,519  | 58            | 100  |
| Minocycline          | N.D.  | 58     | N.D.   | 198   | 124   | 57    | 1,251  | N.D.  | 102   | 184    | 74     | N.D.  | N.D.   | N.D.  | N.D.   | N.D.   | N.D.   | N.D.    | N.D.   | 251    | 60     | N.D.    | 45    | 141    | N.D.   | N.D.      | 212 (334)       | 1,251   | 45            | 100  |
| Oxytetracycline      | N.D.  | N.D.   | N.D.   | N.D.  | N.D.  | N.D.  | N.D.   | N.D.  | N.D.  | N.D.   | N.D.   | N.D.  | N.D.   | N.D.  | N.D.   | N.D.   | N.D.   | N.D.    | N.D.   | N.D.   | N.D.   | N.D.    | N.D.  | N.D.   | N.D.   | N.D.      | N.A.            | N.A.    | N.A.          | N.A. |
| Tetracycline         | N.D.  | N.D.   | N.D.   | N.D.  | N.D.  | N.D.  | N.D.   | N.D.  | N.D.  | N.D.   | N.D.   | N.D.  | N.D.   | N.D.  | N.D.   | N.D.   | N.D.   | N.D.    | N.D.   | N.D.   | N.D.   | N.D.    | N.D.  | N.D.   | N.D.   | N.D.      | N.A.            | N.A.    | N.A.          | N.A. |
| Vancomycin           | 1,359 | 13,562 | 7,198  | 2,273 | 6,342 | 1,672 | 32,102 | 2,942 | 6,326 | 17,717 | 3,006  | 645   | 29,377 | 5,148 | 64,388 | 10,940 | 7,244  | 1,560   | 5,430  | 26,138 | 10,599 | 4,554   | 9,564 | 12,477 | 4,537  | 1,935     | 11,117 (13,860) | 64,388  | 645           | 100  |

N.D.: Not detected, N.A.: Not available.

Table S2. The Occurrence of antimicrobials in hospital wastewater based on HTA using 96-well plate-type SPE was developed in this study, using a combination of an automated pipetting system and an automated SPE pre-treatment system.

| Antimicrobials       | 2021   |        |        |       |        |       |        |       |       |        | 2022   |       |        |       |        |        |        |        |        |       | 2023   |         |        |        |        | Mean (SD) | Max             | Min     | Frequency (%) |      |
|----------------------|--------|--------|--------|-------|--------|-------|--------|-------|-------|--------|--------|-------|--------|-------|--------|--------|--------|--------|--------|-------|--------|---------|--------|--------|--------|-----------|-----------------|---------|---------------|------|
|                      | 0126   | 0426   | 0531   | 0629  | 0727   | 0830  | 0921   | 1026  | 1129  | 1221   | 0228   | 0328  | 0425   | 0525  | 0627   | 0725   | 0829   | 0928   | 1031   | 1129  | 1226   | 0130    | 0228   | 0327   | 0424   |           |                 |         |               | 0529 |
| Ampicillin           | N.D.   | N.D.   | N.D.   | N.D.  | N.D.   | N.D.  | N.D.   | N.D.  | N.D.  | N.D.   | 10,281 | 2,276 | N.D.   | N.D.  | 2,303  | N.D.   | 11,456 | 76,782 | 1,810  | 692   | 8,218  | 248,463 | N.D.   | N.D.   | 747    | N.D.      | 36,303 (78,010) | 248,463 | 692           | 100  |
| Benzylpenicillin     | N.D.   | N.D.   | N.D.   | N.D.  | N.D.   | N.D.  | N.D.   | N.D.  | N.D.  | N.D.   | N.D.   | N.D.  | N.D.   | N.D.  | N.D.   | N.D.   | N.D.   | N.D.   | N.D.   | N.D.  | N.D.   | N.D.    | N.D.   | N.D.   | N.D.   | N.D.      | N.A.            | N.A.    | N.A.          | N.A. |
| Cefdinir             | N.D.   | N.D.   | N.D.   | N.D.  | N.D.   | N.D.  | N.D.   | N.D.  | N.D.  | N.D.   | N.D.   | N.D.  | N.D.   | N.D.  | N.D.   | N.D.   | N.D.   | N.D.   | N.D.   | N.D.  | N.D.   | N.D.    | N.D.   | N.D.   | N.D.   | N.D.      | N.A.            | N.A.    | N.A.          | N.A. |
| Cefpodoxime          | 239    | N.D.   | N.D.   | N.D.  | N.D.   | 162   | N.D.   | N.D.  | 769   | 291    | 2,863  | 103   | 2,957  | 3,029 | N.D.   | 281    | 1,276  | 295    | N.D.   | 929   | 1,276  | 445     | N.D.   | N.D.   | 1,002  | N.D.      | 1,061 (1,051)   | 3,029   | 103           | 100  |
| Cefpodoxime Proxetil | N.D.   | N.D.   | N.D.   | N.D.  | N.D.   | N.D.  | N.D.   | N.D.  | N.D.  | N.D.   | N.D.   | N.D.  | N.D.   | N.D.  | N.D.   | N.D.   | N.D.   | N.D.   | N.D.   | N.D.  | N.D.   | N.D.    | N.D.   | N.D.   | N.D.   | N.D.      | N.A.            | N.A.    | N.A.          | N.A. |
| Ceftiofur            | N.D.   | N.D.   | N.D.   | N.D.  | N.D.   | N.D.  | N.D.   | N.D.  | N.D.  | N.D.   | N.D.   | N.D.  | N.D.   | N.D.  | N.D.   | N.D.   | N.D.   | N.D.   | N.D.   | N.D.  | N.D.   | N.D.    | N.D.   | N.D.   | N.D.   | N.D.      | N.A.            | N.A.    | N.A.          | N.A. |
| Ciprofloxacin        | N.D.   | N.D.   | N.D.   | N.D.  | 502    | N.D.  | 143    | 49    | N.D.  | 2,530  | N.D.   | N.D.  | N.D.   | N.D.  | N.D.   | N.D.   | N.D.   | N.D.   | 231    | 572   | N.D.   | N.D.    | 497    | N.D.   | N.D.   | 455       | 622 (794)       | 2,530   | 49            | 100  |
| Enrofloxacin         | N.D.   | N.D.   | N.D.   | N.D.  | N.D.   | N.D.  | N.D.   | N.D.  | N.D.  | N.D.   | N.D.   | N.D.  | N.D.   | N.D.  | N.D.   | N.D.   | N.D.   | N.D.   | N.D.   | N.D.  | N.D.   | N.D.    | N.D.   | N.D.   | N.D.   | N.D.      | N.A.            | N.A.    | N.A.          | N.A. |
| Levofloxacin         | 22,948 | 16,104 | 31,142 | 3,126 | 1,827  | 1,048 | 11,235 | 313   | 2,582 | 42,747 | 3,524  | 3,718 | 13,867 | 2,643 | 29,962 | 13,705 | 26,004 | 6,729  | 6,807  | 5,755 | 2,157  | 3,304   | 3,073  | 5,783  | 19,402 | 4,088     | 10,907 (11,315) | 42,747  | 313           | 100  |
| Azithromycin         | N.D.   | N.D.   | 2,339  | 509   | N.D.   | N.D.  | N.D.   | N.D.  | N.D.  | 2,828  | 8,507  | 2,346 | 2,755  | N.D.  | N.D.   | N.D.   | N.D.   | N.D.   | N.D.   | 2,763 | N.D.   | N.D.    | N.D.   | N.D.   | 12,095 | 4,786     | 4,325 (3,668)   | 12,095  | 509           | 100  |
| Clarithromycin       | 3,962  | N.D.   | 462    | 426   | 4,739  | N.D.  | 1,078  | N.D.  | 4,892 | 24,441 | 1,020  | 5,863 | N.D.   | 280   | 1,459  | 323    | N.D.   | N.D.   | 675    | 2,669 | 734    | 353     | 465    | 394    | 565    | 622       | 2,771 (5,402)   | 24,441  | 280           | 100  |
| Chlortetracycline    | N.D.   | N.D.   | N.D.   | N.D.  | N.D.   | N.D.  | N.D.   | N.D.  | N.D.  | N.D.   | N.D.   | N.D.  | N.D.   | N.D.  | N.D.   | N.D.   | N.D.   | N.D.   | N.D.   | N.D.  | N.D.   | N.D.    | N.D.   | N.D.   | N.D.   | N.D.      | N.A.            | N.A.    | N.A.          | N.A. |
| Doxycycline          | N.D.   | 3,964  | 508    | 69    | 98     | N.D.  | 14,273 | N.D.  | 207   | 212    | 817    | 316   | 389    | 191   | 133    | N.D.   | N.D.   | N.D.   | 468    | 167   | N.D.   | N.D.    | 159    | 104    | 742    | 405       | 1,290 (3,359)   | 14,273  | 69            | 100  |
| Minocycline          | N.D.   | N.D.   | N.D.   | N.D.  | 139    | N.D.  | 1,064  | N.D.  | 105   | 135    | 151    | N.D.  | N.D.   | N.D.  | N.D.   | N.D.   | N.D.   | N.D.   | N.D.   | 216   | 27     | N.D.    | N.D.   | 57     | N.D.   | N.D.      | 237 (339)       | 1,064   | 27            | 100  |
| Oxytetracycline      | N.D.   | N.D.   | N.D.   | N.D.  | N.D.   | N.D.  | N.D.   | N.D.  | N.D.  | N.D.   | N.D.   | N.D.  | N.D.   | N.D.  | N.D.   | N.D.   | N.D.   | N.D.   | N.D.   | N.D.  | N.D.   | N.D.    | N.D.   | N.D.   | N.D.   | N.D.      | N.A.            | N.A.    | N.A.          | N.A. |
| Tetracycline         | N.D.   | N.D.   | N.D.   | N.D.  | N.D.   | N.D.  | N.D.   | N.D.  | N.D.  | N.D.   | N.D.   | N.D.  | N.D.   | N.D.  | N.D.   | N.D.   | N.D.   | N.D.   | N.D.   | N.D.  | N.D.   | N.D.    | N.D.   | N.D.   | N.D.   | N.D.      | N.A.            | N.A.    | N.A.          | N.A. |
| Vancomycin           | 1,861  | 15,206 | 6,888  | 4,729 | 10,335 | 2,236 | 14,483 | 1,204 | 9,146 | 23,102 | 3,784  | 2,642 | 57,947 | 6,469 | 34,181 | 11,519 | 12,493 | 12,579 | 22,491 | 3,420 | 24,283 | 5,586   | 20,751 | 16,766 | 7,486  | 15,660    | 13,356 (12,321) | 57,947  | 1,204         | 100  |

N.D.: Not detected, N.A.: Not available.
